# Supplementary material
Source: publisher figshare collection journal article supplement (https://frontiersin.figshare.com/ndownloader/files/13851827)
Supplement: Supplementary file [file 13851827]

# Supplementary Material: Associations Between Genetic Data and Quantitative Assessment of Normal Facial Asymmetry

## 1 GWAS EXCLUDING SUBJECTS YOUNGER THAN 14

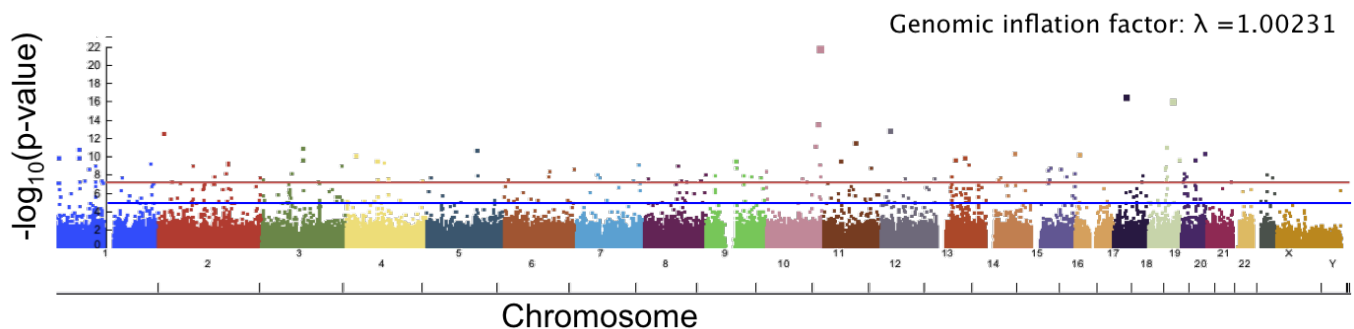

**Figure S1.** Manhattan plot showing significance of the relationship between each SNP and our asymmetry score using the surface orientation score. The red line corresponds to a threshold of genome-wide significance of  $p = 5 \times 10^{-8}$  and the blue line corresponds to a threshold of suggested significance  $p = 1 \times 10^{-5}$ .

**Table S1.** Top significant SNPs associated with our asymmetry scores using the surface orientation feature after exclusion of subjects younger than 14 years old.

| SNP        | Chromosome | Gene    | P-Values               | FDR-corrected          |
|------------|------------|---------|------------------------|------------------------|
| exm861196  | 10         | TACC2   | $3.12 \times 10^{-14}$ | $3.50 \times 10^{-10}$ |
| rs4357783  | 12         | SOX5    | $1.43 \times 10^{-13}$ | $3.74 \times 10^{-10}$ |
| exm173678  | 2          | NAG     | $3.47 \times 10^{-13}$ | $7.53 \times 10^{-10}$ |
| rs8088297  | 18         | MAPK4   | $1.01 \times 10^{-11}$ | $2.12 \times 10^{-8}$  |
| rs7186843  | 16         | TEKT5   | $7.31 \times 10^{-11}$ | $1.50 \times 10^{-7}$  |
| exm20439   | 1          | FAM131C | $1.57 \times 10^{-10}$ | $3.19 \times 10^{-7}$  |
| exm20576   | 1          | FAM131C | $1.57 \times 10^{-10}$ | $3.19 \times 10^{-7}$  |
| rs11208297 | 1          | ROR1    | $1.62 \times 10^{-10}$ | $3.29 \times 10^{-7}$  |
| rs165149   | 18         | NFATC1  | $2.52 \times 10^{-10}$ | $5.09 \times 10^{-7}$  |
| rs4597218  | 13         | GTF2F2  | $2.93 \times 10^{-10}$ | $5.89 \times 10^{-7}$  |

## 2 FACIAL SURFACE LANDMARKS

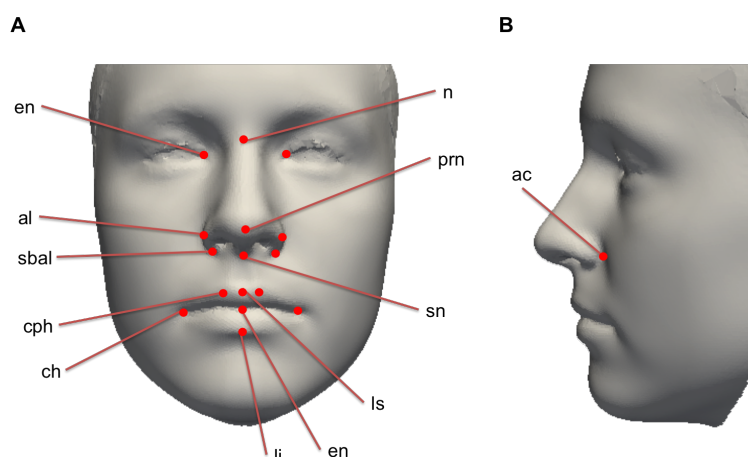

**Figure S2.** Facial mesh showing 18 landmarks used for alignment and analysis. Landmarks shown in the frontal view (A) are: endocanthion (en); alare (al); subalare (sbal); crista philtra (cph); chelion (ch); nasion (n), pronasale (prn), subnasale (sn); nasion; pronasale (prn); subnasale (sn); labiale superius (ls); labiale inferius (li). In this view, bilateral landmarks are labeled only on the right side. The lateral view (B) shows the landmark alar curvature point (ac). This is a bilateral point shown only on the left side.

## 3 CORRELATION OF ASYMMETRY SCORES WITH AGE

**Table S2.** Pearson correlation coefficient and significance of correlation between age and each asymmetry score

| Phenotype score              | Pearson correlation coefficient | P-Value                |
|------------------------------|---------------------------------|------------------------|
| Angle of surface orientation | 0.1803                          | $1.08 \times 10^{-18}$ |
| Angle of deformation         | 0.1146                          | $2.40 \times 10^{-8}$  |

## 4 CORRELATION OF ASYMMETRY SCORES WITH SEX

**Table S3.** Kendall's tau coefficient and significance of correlation between sex and each asymmetry score

| Phenotype score              | Kendall's tau coefficient | P-Value               |
|------------------------------|---------------------------|-----------------------|
| Angle of surface orientation | -0.0747                   | $8.94 \times 10^{-6}$ |
| Angle of deformation         | -0.0441                   | 0.0088                |

## 5 HERITABILITY OF ASYMMETRY SCORES

**Table S4.** Proportion of variance for each asymmetry score explained by all GWAS SNPs, estimated using Genome-wide Complex Trait Analysis

| Phenotype score              | Proportion of variance | Standard Error | P-Value               |
|------------------------------|------------------------|----------------|-----------------------|
| Angle of surface orientation | 0.5688                 | 0.1486         | $5.13 \times 10^{-5}$ |
| Angle of deformation         | $1.00 \times 10^{-6}$  | 0.1453         | 0.5                   |

## 6 OUR ASYMMETRY SCORE USING DEFORMATION MAGNITUDE FEATURE

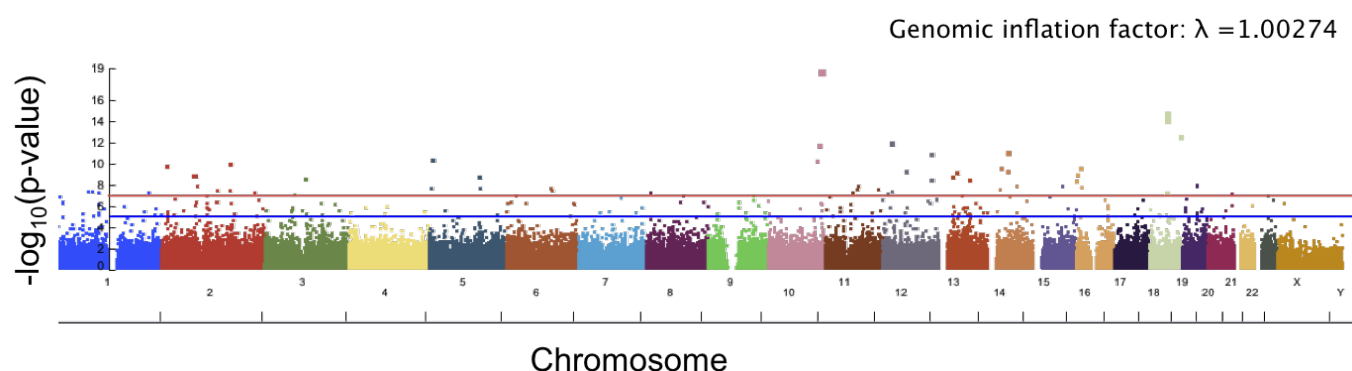

**Figure S3.** Manhattan plot showing significance of the relationship between each SNP and our asymmetry score using the deformation magnitude feature. This local feature is defined at each point on an individual facial mesh as the length vector between that point and the corresponding point on the mirror image. This local property is then used to calculate an overall score of asymmetry following the procedure outlined in the Methods section 2.2. The red line corresponds to a threshold of genome-wide significance of  $p = 5 \times 10^{-8}$  and the blue line corresponds to a threshold of suggested significance  $p = 1 \times 10^{-5}$ .

**Table S5.** Top significant SNPs associated with our asymmetry score using deformation magnitude feature.

| SNP        | Chromosome | Gene    | P-Values              | FDR-corrected |
|------------|------------|---------|-----------------------|---------------|
| rs1872004  | 5          | MYO10   | $1.71 \times 10^{-6}$ | 0.0034        |
| exm1347199 | 17         | ABCA5   | $3.15 \times 10^{-6}$ | 0.0063        |
| rs6504459  | 17         | ABCA5   | $3.15 \times 10^{-6}$ | 0.0063        |
| exm446558  | 5          | MYO10   | $3.95 \times 10^{-6}$ | .0078         |
| rs10955278 | 8          | CNBD1   | $4.25 \times 10^{-6}$ | 0.0084        |
| rs2905419  | 8          | CNBD1   | $4.38 \times 10^{-6}$ | 0.0086        |
| rs3756766  | 5          | CDC25C  | $4.80 \times 10^{-6}$ | 0.0094        |
| rs7717298  | 5          | MYO10   | $5.00 \times 10^{-6}$ | 0.0098        |
| rs10900851 | 5          | CDC25C  | $5.81 \times 10^{-6}$ | 0.0113        |
| exm2257834 | 6          | CYP39A1 | $6.65 \times 10^{-6}$ | 0.0127        |

## 7 GWAS USING COMPARABLE DEFORMABLE MORPHOLOGY APPROACH

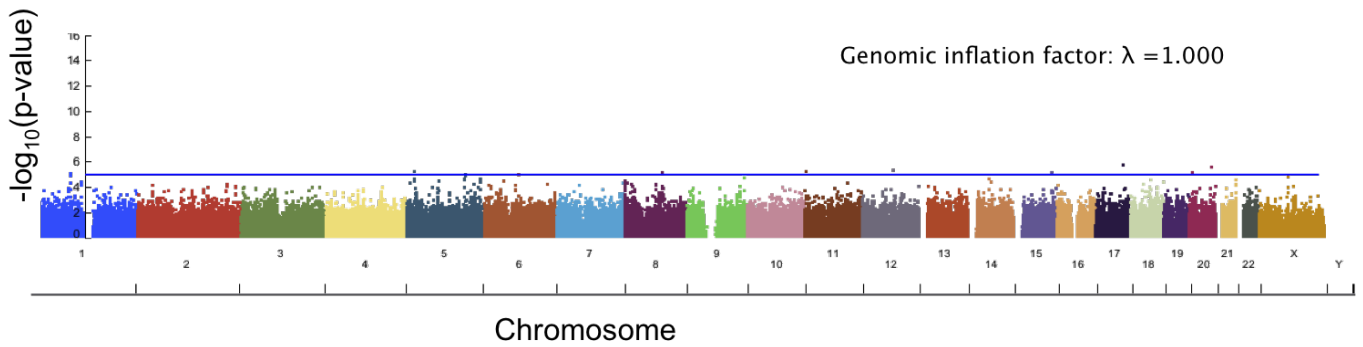

**Figure S4.** Manhattan plot showing significance of the relationship between each SNP and a score assigned by a comparable deformable morphology method as described in (Verhoeven, 2016). In this work, a local asymmetry feature is defined as the magnitude of the distance between each point on a facial image and its corresponding point on a mirrored image. A measure of total facial asymmetry was calculated using the average of these distances over the face. The blue line corresponds to a threshold of suggested significance  $p = 1 \times 10^{-5}$ . No SNPs were found to meet the threshold of genome-wide significance of  $p = 5 \times 10^{-8}$

## 8 GWAS USING TRADITIONAL LANDMARK-BASED APPROACH

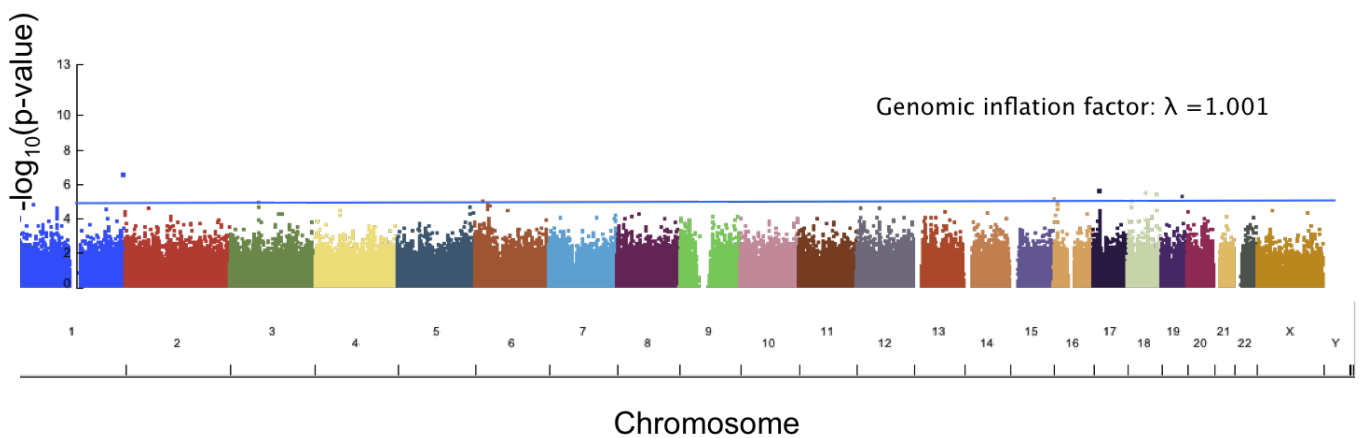

**Figure S5.** Manhattan plot showing significance of the relationship between each SNP and a score assigned by a traditional landmark-based method that uses the Procrustes distance between right and left sides (Bookstein, 1997). Images were aligned with a mirrored copy and the Euclidean distance between 12 right/left landmark pairs was measured. A score of total facial asymmetry was calculated using the average of these distances. The blue line corresponds to a threshold of suggested significance  $p = 1 \times 10^{-5}$ . No SNPs were found to meet the threshold of genome-wide significance of  $p = 5 \times 10^{-8}$
